# Supplementary material for: Land use around protected areas affects functional diversity, but not species richness in anuran assemblages
Source: Research Square preprint supplement (doi:10.21203/rs.3.rs-7820762/v1), 2025-11-05
Supplement: Supplementary file 1 [file 3aff36ea3d397d80bdc5161e.xlsx]

## Sheet: Folha1
Supplementary Information to: Land use around protected areas affects functional diversity, but not species richness in anuran assemblages Priscila do Nascimento Lopes1,2*; Lucas Batista Crivellari3,4, Thiago Alves Lopes de Oliveira1, Ricardo J. Sawaya5, Denise Rossa-Feres6, Leandro Duarte1 1Laboratório de Ecologia Filogenética e Funcional, Department of Ecology, Universidade Federal do Rio Grand…
Table S9: Species composition matrix. DFPA = Serra Dona Francisca Environmental Protection Area; PNF = Piraí do Sul National Forest; GSP = Guartelá State Park; VVSP = Vila Velha State Park; CGNP = Campos Gerais National Park; CWR = Campos de Palmas Wildlife Refuge; INF = Irati National Forest, GAEF = Gralha Azul Experimental Farm (PUC – Paraná).
Species	DFPA01	DFPA02	DFPA03	DFPA04	DFPA05	DFPA06	DFPA07	DFPA08	DFPA09	DFPA10	DFPA11	DFPA12	DFPA13	PNF1	PNF2	PNF3	PNF4	PNF5	PNF6	PNF7	PNF8	GSP1	GSP2	GSP3	GSP4	GSP5	GSP6	GSP7	GSP8	GSP9	GSP10	VVSP1	VVSP2	VVSP3	VVSP4	VVSP5	VVSP6	VVSP7	VVSP8	CGNP1	CGNP2	CGNP3	CGNP4	CGNP5	CGNP6	CGNP7	CGNP8	CGNP9	CGNP10
Aplastodiscus albosignatus	0	0	0	15	22	1	0	0	15	0	0	10	0	0	0	2	6	4	0	0	0	0	0	0	0	0	0	0	0	0	0	0	0	0	0	0	0	5	0	0	0	0	0	0	0	0	0	6	0
Aplastodiscus ehrhardti	0	0	0	0	3	0	0	0	0	0	0	0	0	0	0	0	0	0	0	0	0	0	0	0	0	0	0	0	0	0	0	0	0	0	0	0	0	0	0	0	0	0	0	0	0	0	0	0	0
Aplastodiscus perviridis	0	1	0	0	0	0	0	0	0	0	0	14	0	0	0	16	16	1	0	0	0	0	0	10	0	0	0	0	4	6	0	0	0	0	0	4	5	10	0	0	0	0	0	0	7	0	0	0	0
Boana albopunctata	3	38	9	0	0	0	0	0	0	0	0	0	0	88	18	3	0	6	77	5	39	0	0	24	0	0	0	0	5	6	0	9	0	0	0	3	24	21	6	0	71	0	0	7	16	0	0	0	0
Boana bischoffi	58	26	14	45	24	59	30	25	122	10	1	6	0	1	35	13	9	63	16	20	0	0	0	0	0	0	0	0	0	0	0	0	5	0	35	0	0	0	30	5	0	0	0	0	14	0	14	15	12
Boana faber	5	1	0	8	0	2	18	0	0	1	0	0	1	11	7	0	0	0	0	0	0	2	0	0	5	6	0	0	13	0	0	0	2	0	22	3	11	10	41	21	0	0	0	0	0	0	7	0	0
Boana leptolineata	0	0	0	0	0	0	0	0	0	0	0	0	0	0	0	0	0	0	0	0	0	0	0	0	0	0	0	0	0	0	0	0	0	0	0	0	0	0	0	0	0	0	0	0	0	0	0	0	0
Boana prasina	0	0	0	0	0	0	0	0	0	0	0	0	0	0	0	0	0	0	11	0	0	1	3	17	0	0	0	0	34	0	0	0	0	0	0	0	0	0	0	2	23	0	0	0	0	0	0	0	0
Boana pulchella	0	0	0	0	0	0	0	0	0	0	0	0	0	0	0	0	0	0	0	0	0	0	0	0	0	0	0	0	0	0	0	0	0	0	0	0	0	0	0	0	0	0	0	0	0	0	0	0	0
Bokermannohyla circumdata	0	0	0	0	10	0	0	0	4	0	0	3	0	0	0	0	0	0	0	0	0	0	0	0	0	0	0	0	0	0	0	0	0	0	0	0	0	0	0	0	0	0	0	0	0	0	0	0	0
Bokermannohyla hylax	0	0	0	0	9	0	0	0	0	0	0	0	0	0	0	0	0	0	0	0	0	0	0	0	0	0	0	0	0	0	0	0	0	0	0	0	0	0	0	0	0	0	0	0	0	0	0	0	0
Chiasmocleis leucosticta	0	0	0	0	0	0	0	0	0	0	0	0	0	0	0	0	0	0	0	0	0	0	0	0	0	0	0	0	0	0	0	0	0	0	0	0	0	0	0	0	0	0	0	0	0	110	0	23	0
Dendropsophus microps	0	0	0	2	2	0	0	0	0	4	0	0	0	0	3	0	29	45	0	0	0	0	0	0	0	0	0	0	0	0	0	0	0	0	6	0	0	0	39	0	0	0	0	0	0	462	40	11	0
Dendropsophus minutus	38	0	0	300	0	0	0	12	0	17	0	3	26	170	87	0	5	70	64	83	33	13	22	10	20	15	7	108	97	14	5	6	7	0	109	0	31	93	949	81	7	35	2	23	30	0	34	0	5
Dendropsophus nahdereri	0	0	0	7	0	0	4	11	0	2	0	0	0	0	0	0	0	0	0	0	0	0	0	0	0	0	0	0	0	0	0	0	0	0	0	0	0	0	0	0	0	0	0	0	0	0	0	0	0
Dendropsophus sanborni	0	0	0	0	0	0	0	0	0	0	0	0	0	172	43	0	3	0	40	62	60	0	0	0	0	0	0	0	0	0	0	0	0	0	0	0	0	3	5	0	104	7	0	0	0	0	0	0	0
Elachistocleis bicolor	0	0	0	0	0	0	0	0	0	8	2	0	32	0	0	0	0	0	0	0	0	0	0	0	0	0	0	0	0	0	0	0	0	0	0	0	0	0	0	0	0	0	0	0	0	0	0	0	0
Leptodactylus furnarius	0	0	0	0	0	0	0	0	0	0	0	0	0	0	0	0	0	0	0	0	0	0	2	0	0	0	0	0	0	0	0	0	0	0	0	0	0	0	0	0	0	0	0	0	0	0	0	0	0
Leptodactylus fuscus	0	0	0	0	0	0	0	0	0	0	0	0	0	0	0	0	0	0	0	0	0	0	0	0	0	0	0	0	0	0	0	0	0	0	0	0	2	0	0	0	0	0	0	0	0	0	0	0	0
Leptodactylus gracilis	0	0	0	0	0	0	0	0	0	0	0	0	0	0	0	0	0	0	0	0	0	0	3	0	4	22	4	0	0	7	1	0	0	0	0	0	0	0	0	0	0	0	0	0	0	0	0	0	0
Leptodactylus latrans	16	8	3	1	0	3	6	2	1	2	0	5	6	9	3	0	0	0	8	13	1	17	4	8	3	18	3	14	7	0	0	0	4	1	9	0	12	13	62	36	38	16	0	5	0	0	0	0	3
Leptodactylus luctator	0	0	0	0	0	0	0	0	0	0	0	0	0	0	0	0	0	0	0	0	0	2	0	0	0	0	0	0	0	0	0	0	0	0	0	0	0	0	0	0	0	0	0	0	0	0	0	0	0
Leptodactylus notoaktites	0	0	0	0	0	0	7	1	5	0	7	0	0	0	0	0	0	0	1	0	0	0	0	0	0	0	0	0	0	0	0	0	0	0	0	0	0	0	0	11	17	0	0	0	2	27	45	0	0
Leptodactylus plaumanni	2	0	0	0	0	0	0	0	0	4	9	2	8	0	0	0	0	0	0	0	0	0	0	0	0	0	0	0	0	0	0	0	0	0	0	0	0	0	0	0	0	0	0	0	0	0	0	0	0
Melanophryniscus vilavelhensis	0	0	0	0	0	0	0	0	0	0	0	0	0	0	0	0	0	0	0	0	0	0	0	0	0	0	0	0	0	0	10	32	0	0	0	17	5	0	0	0	0	0	0	0	0	0	0	0	0
Odontophrynus asper	0	0	0	0	0	0	0	0	0	0	0	0	6	0	0	0	0	0	0	0	0	1	0	0	0	8	0	8	0	0	6	0	4	0	8	0	0	0	0	0	0	1	26	0	0	3	4	0	10
Ololygon aromothyella	0	0	0	0	0	0	0	0	0	38	2	0	4	0	0	0	0	0	0	0	0	0	0	0	0	0	0	0	0	0	0	0	35	1	42	0	0	0	334	0	0	0	0	0	0	0	0	0	0
Ololygon catharinae	0	0	0	2	0	0	0	0	0	0	0	0	0	0	0	0	0	0	0	0	0	0	0	0	0	0	0	0	0	0	0	0	0	0	0	0	0	0	0	0	0	0	0	0	0	0	0	10	0
Ololygon rizibilis	0	0	0	0	1	0	0	0	0	0	0	0	0	0	2	4	0	0	0	0	0	0	0	0	0	0	0	0	0	0	0	0	0	0	30	0	0	0	635	1	0	0	0	0	0	624	3	24	0
Phyllomedusa distincta	0	0	0	0	0	0	0	0	0	0	0	0	0	0	0	0	0	0	0	0	0	0	0	0	0	0	0	0	0	0	0	0	0	0	0	0	0	0	0	5	0	0	0	0	0	0	31	0	0
Phyllomedusa tetraploidea	0	0	0	0	0	0	0	0	0	0	0	0	0	0	2	0	0	0	0	0	0	0	1	0	1	5	2	0	78	0	7	0	3	5	50	0	0	12	10	0	0	0	0	0	0	0	0	0	0
Physalaemus cuvieri	21	16	5	6	0	0	0	0	0	11	2	4	9	34	14	0	0	10	31	24	11	13	6	10	0	16	3	39	38	0	9	0	6	1	42	0	20	7	466	32	124	20	20	23	12	0	15	0	5
Physalaemus gracilis	10	7	3	12	0	0	0	0	0	10	21	33	0	21	19	7	0	18	31	0	17	3	0	16	3	11	4	15	8	0	11	2	0	0	15	2	5	6	122	6	24	35	0	25	16	0	0	0	0
Physalaemus lateristriga	3	0	0	11	18	1	0	0	0	7	5	0	1	0	0	0	3	4	0	0	0	0	0	0	0	0	0	0	0	0	0	0	0	0	0	0	0	0	0	2	0	0	0	0	0	0	14	0	0
Physalaemus nanus	4	0	0	0	0	0	0	0	0	0	0	6	0	0	0	0	0	0	0	0	0	0	0	0	0	0	0	0	0	0	0	0	0	0	0	0	0	0	0	0	0	0	0	15	0	0	0	0	0
Pithecopus rusticus	0	0	0	0	0	0	0	0	0	0	0	0	0	0	0	0	0	0	0	0	0	0	0	0	0	0	0	0	0	0	0	0	0	0	0	0	0	0	0	0	0	0	0	0	0	0	0	0	0
Proceratophrys boiei	0	0	0	5	25	0	0	0	6	0	0	0	0	0	0	2	2	11	0	0	0	0	0	0	0	0	0	0	0	0	0	0	0	0	0	0	0	0	0	0	0	0	0	0	0	17	0	15	0
Proceratophrys brauni	0	0	0	0	0	0	0	0	0	0	0	0	0	0	0	0	0	0	0	0	0	0	0	0	0	0	0	0	0	8	0	6	0	0	0	0	0	18	0	0	0	0	0	0	0	0	0	0	0
Pseudis cardosoi	0	0	0	0	0	0	0	0	0	0	0	0	0	0	0	0	0	0	0	0	0	0	0	0	0	0	0	0	0	0	0	0	0	0	0	0	0	0	0	0	0	0	0	0	0	0	0	0	0
Rhinella abei	8	0	0	3	0	1	4	0	1	0	0	0	0	0	1	0	0	0	0	3	0	0	0	0	0	0	0	0	0	0	0	3	5	1	46	0	0	8	20	49	18	0	5	4	9	10	6	3	66
Rhinella henseli	0	0	0	0	0	0	0	0	0	0	0	0	0	0	0	0	0	0	0	0	0	0	0	0	0	0	0	0	0	0	0	0	0	0	0	0	0	0	0	0	0	0	0	0	0	0	0	0	0
Rhinella icterica	15	2	3	11	1	1	2	0	2	2	0	0	2	0	0	0	0	0	0	0	0	0	0	0	0	0	0	0	0	0	0	0	0	0	0	0	0	0	0	0	0	0	0	0	0	0	0	0	29
Scinax fuscovarius	0	0	0	0	0	0	1	1	1	0	0	0	1	0	0	0	0	27	0	0	0	8	0	0	0	5	0	0	11	0	0	0	0	0	8	0	0	5	21	49	9	27	20	3	4	5	15	0	30
Scinax granulatus	0	0	0	27	0	0	0	0	0	0	0	18	15	0	0	0	0	0	0	0	0	0	0	0	0	0	0	0	0	0	0	0	0	0	0	0	0	0	0	0	0	0	0	0	0	0	0	0	0
Scinax imbegue	0	0	0	0	0	28	0	2	68	0	0	0	0	0	0	0	0	0	0	0	0	0	0	0	0	0	0	0	0	0	0	0	0	0	0	0	0	0	0	0	0	0	0	0	0	0	0	0	0
Scinax perereca	10	0	0	18	2	11	9	4	4	27	4	2	22	0	2	0	0	0	0	0	0	0	0	0	10	0	0	0	0	0	0	0	0	3	118	0	0	8	540	5	0	0	0	0	0	154	19	7	14
Scinax rossaferesae	0	0	0	0	0	0	0	0	0	0	0	0	0	0	0	0	0	0	0	0	0	25	8	0	18	24	6	90	31	26	5	0	0	0	0	3	25	62	15	0	0	25	0	23	0	0	0	0	0
Scinax squalirostris	0	0	0	0	0	0	0	0	0	0	0	73	0	3	0	0	0	0	0	0	0	9	0	0	0	32	40	160	48	0	4	3	0	0	0	0	81	0	32	0	35	51	28	29	0	0	0	0	0
Scinax uruguayus	0	0	0	0	0	0	0	0	0	0	0	0	0	0	0	0	0	0	0	0	0	3	2	0	0	15	5	96	4	0	0	0	0	0	0	0	0	0	0	0	30	20	46	0	0	0	0	0	0
Scythrophrys sawayae	0	0	0	0	10	0	0	0	2	0	0	0	0	0	0	0	0	0	0	0	0	0	0	0	0	0	0	0	0	0	0	0	0	0	0	0	0	0	0	0	0	0	0	0	0	0	0	0	0
Sphaenorhynchus caramaschii	0	0	0	0	0	0	0	0	0	0	0	0	0	0	15	2	0	89	5	3	0	0	0	0	0	0	0	0	0	0	0	0	0	0	2	0	0	0	5	0	0	0	0	0	0	0	0	5	0
Sphaenorhynchus surdus	51	29	3	137	0	0	0	0	0	0	0	0	0	0	0	0	0	0	0	0	0	0	0	0	0	0	0	0	0	0	0	0	0	0	0	0	0	0	0	0	0	0	0	0	0	0	0	0	0
Trachycephalus dibernardoi	0	0	0	0	0	0	0	0	0	0	0	0	0	0	0	0	0	0	0	0	0	0	0	0	0	0	0	0	0	0	0	0	0	0	0	0	0	0	0	0	0	0	0	0	0	1	0	0	0
[truncated: 32 more columns]
