# Supplementary material for: Land use around protected areas affects functional diversity, but not species richness in anuran assemblages
Source: Research Square preprint supplement (doi:10.21203/rs.3.rs-7820762/v1), 2025-11-05
Supplement: Supplementary file 2 [file bb4adf7d74f9a051a56199c3.docx]

Supplementary Information to:

**Land use around protected areas affects functional diversity, but not species richness in anuran assemblages**

Priscila do Nascimento Lopes1,2*; Lucas Batista Crivellari3,4, Thiago Alves Lopes de Oliveira1, Ricardo J. Sawaya5, Denise Rossa-Feres6, Leandro Duarte1

1Laboratório de Ecologia Filogenética e Funcional, Department of Ecology, Universidade Federal do Rio Grande do Sul (UFRGS), Porto Alegre, RS, Brazil.

2Laboratório Mapinguari, Institute of Biosciences, Universidade Federal de Mato Grosso do Sul (UFMS), Campo Grande, MS, Brazil.

3Department of Zoology, Universidade Federal do Paraná (UFPR), Curitiba, PR, Brazil.

4Cia Ambiental - Assessoria Técnica Ambiental, Curitiba, PR, Brazil.

5Center for Natural and Human Sciences, Universidade Federal do ABC, São Bernardo do Campo, SP, Brazil.

6 Department of Biological Sciences, Universidade Estadual Paulista Júlio de Mesquita Filho (UNESP), São José do Rio Preto, SP, Brazil.

***Corresponding author:** [priscila_nlopes@hotmail.com](mailto:priscila_nlopes@hotmail.com)

Submitted to:

*Biodiversity and Conservation*

**Text S1:** The first axis of the land use variables accounted for 38.2% (Fig. 3.A) of the variation in the variables between the sampling sites. The variables anthropogenic area cover and agricultural area cover showed the greatest negative (-0.65) and positive (0.65) correlation, respectively, with the first axis of the ordination. The variables anthropogenic area cover and agricultural area cover were the most correlated (correlation = - 0.12), as shown in Table S3.A. We therefore selected only agricultural area cover and area cover with exotic reforestation as predictor variables. For native cover, the first axis accounted for 57.7% of the variation (Fig. 3.B) in the total variation of the variables. The variables native forest cover and natural grassland cover showed the highest negative (-0.70) and positive (0.70) correlation, respectively, with the first axis of the ordination. The variables native forest cover and natural grassland cover were the most correlated (correlation = -0.73; Table S3.B). We therefore selected the variables water cover and native forest cover as predictors. As for the habitat variables, the first three axes were considered; each one accounted for 30.2%, 24% and 18.7% of the variation respectively (Total: 72.9%; Fig. 3.C). The variables depth of the body of water and heterogeneity of vegetation on the banks of the bodies of water showed a negative correlation (-0.45 and -0.60), respectively, with the first axis of the ordination. In turn, the depth of the body of water, the hydroperiod and the heterogeneity of the emergent vegetation within the body of water showed a positive (0.52 and 0.62) and negative (-0.47) correlation, respectively, with the second axis of the ordination. Finally, the area of the water body, the heterogeneity of the emergent vegetation within the water body and the canopy cover showed a positive (0.63 and 0.41) and negative (-0.60) correlation, respectively, with the third axis of the ordination. The most correlated variables were: water body depth and hydroperiod (correlation = 0.46; Table S3.C), followed by vegetation heterogeneity on the banks of water bodies and canopy cover (correlation = 0.40; Table S3.C), heterogeneity of vegetation on the banks of water bodies and heterogeneity of emergent vegetation inside the water body (correlation = 0.39; Table S8), heterogeneity of emergent vegetation inside the water body and water body depth (correlation = 0.33; Table S3.C).

.

**Table S1** Local variables of habitat structure in ponds. **ARE** = pond area (m²); **PRO** = pond depth (cm); **HID** = hydroperiod (1 = ephemeral, 2 = semi-permanent, 3 = permanent); **HVM** = number of vegetation strata types on the pond margins; **HVI** = number of vegetation types within the pond; **COB** = percentage of canopy cover.

| Pond | ARE | | | DEP | HYD | | VHM | | VHI | | CC | |
| --- | --- | --- | --- | --- | --- | --- | --- | --- | --- | --- | --- | --- |
| DFPA01 | 2952 | | | 200 | 3 | | 5 | | 3 | | 30.58 | |
| DFPA02 | 6050 | | | 200 | 3 | | 3 | | 3 | | 0.16 | |
| DFPA03 | 984 | | | 200 | 3 | | 3 | | 3 | | 0.16 | |
| DFPA04 | 1200 | | | 200 | 3 | | 5 | | 4 | | 59.7 | |
| DFPA05 | 77 | | | 8 | 2 | | 4 | | 3 | | 97.92 | |
| DFPA06 | 560 | | | 200 | 3 | | 5 | | 1 | | 58.4 | |
| DFPA07 | 43 | | | 66 | 3 | | 2 | | 1 | | 0.16 | |
| DFPA08 | 105 | | | 22 | 1 | | 2 | | 3 | | 0.16 | |
| DFPA09 | 7900 | | | 200 | 3 | | 5 | | 3 | | 13.68 | |
| DFPA10 | 282 | | | 55 | 2 | | 3 | | 4 | | 0.16 | |
| DFPA11 | 440 | | | 9 | 1 | | 2 | | 2 | | 0.16 | |
| DFPA12 | 3698 | | | 40 | 1 | | 3 | | 3 | | 0.16 | |
| DFPA13 | 527 | | | 32 | 2 | | 2 | | 3 | | 0.16 | |
| PNF01 | 332 | | | 200 | 3 | | 4 | | 3 | | 0.16 | |
| PNF02 | 238 | | | 200 | 2 | | 5 | | 3 | | 7.44 | |
| PNF03 | 332 | | | 95 | 3 | | 5 | | 3 | | 25.38 | |
| PNF04 | 1740 | | | 35 | 3 | | 5 | | 4 | | 85.96 | |
| PNF05 | 540 | | | 178 | 3 | | 5 | | 4 | | 7.7 | |
| PNF06 | 3794 | | | 200 | 3 | | 5 | | 3 | | 0.16 | |
| PNF07 | 788 | | | 105 | 3 | | 2 | | 3 | | 0.16 | |
| PNF08 | 259 | | | 70 | 3 | | 3 | | 2 | | 0.16 | |
| GSP01 | 342 | | | 34 | 3 | | 3 | | 1 | | 0.16 | |
| GSP02 | 155 | | | 29 | 1 | | 3 | | 2 | | 0.16 | |
| GSP03 | 135 | | | 44 | 3 | | 3 | | 3 | | 0.16 | |
| GSP04 | 79 | | | 41 | 1 | | 4 | | 2 | | 11.86 | |
| GSP05 | 196 | | | 22 | 2 | | 3 | | 3 | | 0.16 | |
| GSP06 | 241 | | | 33 | 1 | | 3 | | 3 | | 0.16 | |
| GSP07 | 939 | | | 15 | 2 | | 3 | | 4 | | 0.16 | |
| GSP08 | 1024 | | | 170 | 2 | | 4 | | 3 | | 7.96 | |
| GSP09 | 60 | | | 79 | 3 | | 3 | | 2 | | 0.16 | |
| GSP10 | 86 | | | 21 | 1 | | 3 | | 3 | | 0.16 | |
| VVSP01 | 239 | | | 15 | 3 | | 3 | | 3 | | 0.16 | |
| VVSP02 | 1205 | | | 71 | 2 | | 4 | | 3 | | 29 | |
| VVSP03 | 114 | | | 80 | 3 | | 2 | | 2 | | 94.28 | |
| VVSP04 | 2268 | | | 153 | 3 | | 5 | | 4 | | 38 | |
| VVSP05 | 492 | | | 200 | 3 | | 2 | | 1 | | 0.16 | |
| VVSP06 | 1051 | | | 200 | 3 | | 3 | | 2 | | 0.16 | |
| VVSP07 | 214 | | | 193 | 3 | | 5 | | 2 | | 5.36 | |
| VVSP08 | 18934 | | | 75 | 3 | | 5 | | 5 | | 40 | |
|  | |  |  | | |  | |  | |  | |  |
|  | |  |  | | |  | |  | |  | |  |
|  | |  |  | | |  | |  | |  | |  |
| Pond  **Table S1 continued** | | ARE | DEP | | | HYD | | VHM | | VHI | | CC |
| CGNP01 | | 529 | 30 | | | 3 | | 4 | | 3 | | 0.16 |
| CGNP02 | | 1124 | 200 | | | 3 | | 3 | | 3 | | 0.16 |
| CGNP03 | | 1067 | 77 | | | 2 | | 3 | | 3 | | 0.16 |
| CGNP04 | | 8995 | 20 | | | 1 | | 2 | | 2 | | 0.16 |
| CGNP05 | | 360 | 107 | | | 3 | | 2 | | 1 | | 0.16 |
| CGNP06 | | 197 | 41 | | | 3 | | 3 | | 3 | | 0.16 |
| CGNP07 | | 540 | 55 | | | 1 | | 5 | | 4 | | 52.16 |
| CGNP08 | | 176 | 33 | | | 2 | | 4 | | 3 | | 17.58 |
| CGNP09 | | 2037 | 44 | | | 1 | | 5 | | 4 | | 70.36 |
| CGNP10 | | 857 | 34 | | | 1 | | 4 | | 2 | | 0.16 |
| CGNP11 | | 148 | 60 | | | 3 | | 5 | | 5 | | 21.22 |
| CGNP12 | | 165 | 138 | | | 3 | | 5 | | 4 | | 22.78 |
| CGNP13 | | 893 | 168 | | | 3 | | 3 | | 1 | | 76.6 |
| CGNP14 | | 3864 | 87 | | | 3 | | 4 | | 4 | | 7.44 |
| CWR01 | | 1471 | 81 | | | 3 | | 2 | | 3 | | 0.16 |
| CWR02 | | 357 | 38 | | | 1 | | 2 | | 3 | | 0.16 |
| CWR03 | | 381 | 200 | | | 3 | | 2 | | 3 | | 0.16 |
| CWR04 | | 3803 | 75 | | | 3 | | 3 | | 3 | | 0.16 |
| CWR05 | | 3307 | 200 | | | 3 | | 4 | | 3 | | 6.92 |
| CWR06 | | 2329 | 65 | | | 3 | | 3 | | 3 | | 0.16 |
| CWR07 | | 2522 | 84 | | | 2 | | 2 | | 3 | | 0.16 |
| CWR08 | | 2563 | 61 | | | 3 | | 2 | | 3 | | 0.16 |
| CWR09 | | 3461 | 42 | | | 3 | | 2 | | 3 | | 0.16 |
| CWR10 | | 2293 | 85 | | | 2 | | 4 | | 1 | | 0.16 |
| CWR11 | | 2089 | 14 | | | 2 | | 4 | | 4 | | 17.06 |
| CWR12 | | 2723 | 200 | | | 3 | | 3 | | 1 | | 5.1 |
| INF01 | | 256 | 32 | | | 1 | | 5 | | 3 | | 12.64 |
| INF02 | | 528 | 150 | | | 2 | | 5 | | 3 | | 9.26 |
| INF03 | | 2084 | 180 | | | 2 | | 4 | | 4 | | 32.14 |
| INF04 | | 64 | 24 | | | 1 | | 3 | | 3 | | 96.62 |
| INF05 | | 168 | 200 | | | 3 | | 5 | | 3 | | 89.34 |
| INF06 | | 2166 | 170 | | | 2 | | 5 | | 4 | | 0.16 |
| INF07 | | 9072 | 200 | | | 3 | | 5 | | 4 | | 32.4 |
| INF08 | | 6720 | 166 | | | 2 | | 4 | | 3 | | 17.32 |
| GAEF01 | | 1504 | 150 | | | 1 | | 5 | | 5 | | 10 |
| GAEF02 | | 641 | 25 | | | 2 | | 3 | | 4 | | 0.16 |
| GAEF03 | | 54 | 180 | | | 1 | | 5 | | 1 | | 91.68 |
| GAEF08 | | 729 | 69 | | | 3 | | 5 | | 2 | | 4.32 |
| GAEF09 | | 1052 | 200 | | | 3 | | 5 | | 3 | | 38.9 |
| GAEF10 | | 670 | 200 | | | 3 | | 2 | | 1 | | 0.16 |
| GAEF11 | | 2770 | 166 | | | 3 | | 3 | | 3 | | 0.16 |
| GAEF12 | | 1090 | 86 | | | 3 | | 4 | | 3 | | 0.16 |

**Table S2**: Landscape variables related to land use (m²) and native cover (m²), as well as spatial variables (cm) measured within 250 meters radius buffers around each of the 81 sampled ponds. **AGR** = agricultural area cover; **ANT** = anthropic area cover; **REF** = area cover with exotic species reforestion; **WAT** = water cover; **GRA** = native grassland cover; **FOR** = native forest cover; **DNP** = distance (meters) to the nearest pond occupied by amphibians; **DNF** = distance (meters) to the nearest forest fragment.

| **Pond** | **FOR** | **GRA** | **AGR** | **ANT** | **WAT** | **REF** | **DNP** | **DNF** |
| --- | --- | --- | --- | --- | --- | --- | --- | --- |
| DFPA01 | 96747 | 99492 | 0 | 0 | 0 | 0 | 40 | 10 |
| DFPA02 | 51222 | 145011 | 0 | 0 | 0 | 0 | 27 | 65 |
| DFPA03 | 47596 | 148637 | 0 | 0 | 0 | 0 | 30 | 110 |
| DFPA04 | 66326 | 129911 | 0 | 0 | 0 | 0 | 200 | 0 |
| DFPA05 | 141803 | 37567 | 0 | 0 | 16884 | 0 | 65 | 0 |
| DFPA06 | 116279 | 43929 | 0 | 0 | 36046 | 0 | 51 | 0 |
| DFPA07 | 153476 | 42775 | 0 | 0 | 0 | 0 | 70 | 45 |
| DFPA08 | 153476 | 42775 | 0 | 0 | 0 | 0 | 70 | 40 |
| DFPA09 | 152208 | 44048 | 0 | 0 | 0 | 0 | 91 | 10 |
| DFPA10 | 85554 | 107497 | 0 | 3184 | 0 | 0 | 304 | 30 |
| DFPA11 | 123878 | 24942 | 0 | 47413 | 0 | 0 | 447 | 120 |
| DFPA12 | 111439 | 84798 | 0 | 0 | 0 | 0 | 67 | 10 |
| DFPA13 | 24169 | 156944 | 0 | 15124 | 0 | 0 | 136 | 168 |
| PNF01 | 40756 | 96177 | 53949 | 0 | 5268 | 0 | 126 | 30 |
| PNF02 | 63990 | 47339 | 84821 | 0 | 0 | 0 | 80 | 0 |
| PNF03 | 150494 | 5092 | 70 | 40494 | 0 | 0 | 431 | 0 |
| PNF04 | 65693 | 0 | 29919 | 0 | 0 | 100534 | 800 | 20 |
| PNF05 | 173143 | 0 | 10949 | 0 | 0 | 12055 | 127 | 0 |
| PNF06 | 28171 | 81639 | 81071 | 0 | 5268 | 0 | 10 | 15 |
| PNF07 | 62846 | 16119 | 117185 | 0 | 0 | 0 | 80 | 40 |
| PNF08 | 35652 | 87604 | 67625 | 0 | 5268 | 0 | 10 | 10 |
| GSP1 | 44894 | 135904 | 15320 | 0 | 0 | 0 | 330 | 78 |
| GSP02 | 6876 | 102539 | 86703 | 0 | 0 | 0 | 75 | 200 |
| GSP03 | 0 | 58609 | 137508 | 0 | 0 | 0 | 91 | 350 |
| GSP04 | 77561 | 118558 | 0 | 0 | 0 | 0 | 270 | 5 |
| GSP05 | 43059 | 153060 | 0 | 0 | 0 | 0 | 270 | 50 |
| GSP06 | 94455 | 96807 | 4858 | 0 | 0 | 0 | 630 | 25 |
| GSP07 | 21256 | 157223 | 17641 | 0 | 0 | 0 | 630 | 96 |
| GSP08 | 0 | 110568 | 62333 | 0 | 0 | 23217 | 30 | 83 |
| GSP09 | 0 | 16589 | 172449 | 0 | 0 | 7080 | 240 | 80 |
| GSP10 | 61080 | 64192 | 70847 | 0 | 0 | 0 | 235 | 33 |
| VVSP01 | 31086 | 165053 | 0 | 0 | 0 | 31086 | 1264 | 79 |
| VVSP02 | 90687 | 105450 | 0 | 0 | 0 | 90687 | 95 | 0 |
| VVSP03 | 74305 | 121833 | 0 | 0 | 0 | 74305 | 90 | 50 |
| VVSP04 | 173032 | 23105 | 0 | 0 | 0 | 173032 | 77 | 0 |
| VVSP05 | 13944 | 170593 | 0 | 11605 | 0 | 13944 | 653 | 366 |
| VVSP06 | 0 | 196142 | 0 | 0 | 0 | 0 | 27 | 542 |
| VVSP07 | 81178 | 114964 | 0 | 0 | 0 | 81178 | 44 | 0 |
| VVSP08 | 131644 | 64606 | 0 | 0 | 0 | 131644 | 90 | 50 |

| **Pond** | | **FOR** | **GRA** | **AGR** | **ANT** | **WAT** | **REF** | **DNP** | **DNF** |
| --- | --- | --- | --- | --- | --- | --- | --- | --- | --- |
| CGNP01 | 76971 | | 96259 | 16861 | 0 | 6056 | 76971 | 219 | 28 |
| CGNP02 | 9116 | | 150261 | 24093 | 0 | 12677 | 9116 | 219 | 215 |
| CGNP03 | 0 | | 83585 | 112561 | 0 | 0 | 0 | 110 | 140 |
| CGNP04 | 0 | | 39856 | 156292 | 0 | 0 | 0 | 160 | 300 |
| CGNP05 | 0 | | 25957 | 170189 | 0 | 0 | 0 | 930 | 100 |
| CGNP06 | 125354 | | 11 | 70778 | 0 | 0 | 125354 | 734 | 55 |
| CGNP07 | 196143 | | 0 | 0 | 0 | 0 | 196143 | 734 | 0 |
| CGNP08 | 124873 | | 71271 | 0 | 0 | 0 | 124873 | 215 | 30 |
| CGNP09 | 152517 | | 24757 | 17550 | 0 | 1323 | 152517 | 40 | 0 |
| CGNP10 | 117613 | | 73155 | 0 | 0 | 5379 | 117613 | 33 | 27 |
| CGNP11 | 102141 | | 30196 | 10529 | 36020 | 17264 | 102141 | 44 | 0 |
| CGNP12 | 168689 | | 0 | 0 | 18878 | 1514 | 168689 | 60 | 0 |
| CGNP13 | 99864 | | 89392 | 0 | 0 | 6892 | 99864 | 125 | 0 |
| CGNP14 | 59238 | | 22932 | 25474 | 88500 | 0 | 59238 | 141 | 50 |
| CWR01 | 0 | | 189273 | 6825 | 0 | 0 | 0 | 70 | 186 |
| CWR02 | 0 | | 179035 | 17063 | 0 | 0 | 0 | 87 | 216 |
| CWR03 | 0 | | 170597 | 25501 | 0 | 0 | 0 | 80 | 280 |
| CWR04 | 0 | | 144928 | 51174 | 0 | 0 | 0 | 70 | 370 |
| CWR05 | 129708 | | 66399 | 0 | 0 | 0 | 129708 | 230 | 0 |
| CWR06 | 40471 | | 155637 | 0 | 0 | 0 | 40471 | 80 | 150 |
| CWR07 | 4007 | | 192102 | 0 | 0 | 0 | 4007 | 171 | 90 |
| CWR08 | 0 | | 189733 | 6379 | 0 | 0 | 0 | 60 | 426 |
| CWR09 | 21579 | | 174530 | 0 | 0 | 0 | 21579 | 180 | 170 |
| CWR10 | 0 | | 180231 | 14338 | 0 | 0 | 0 | 420 | 710 |
| CWR11 | 132649 | | 63464 | 0 | 0 | 0 | 132649 | 144 | 0 |
| CWR12 | 88599 | | 14742 | 92751 | 0 | 0 | 88599 | 181 | 0 |
| INF01 | 110382 | | 85712 | 0 | 0 | 0 | 110382 | 2520 | 20 |
| INF02 | 187194 | | 8899 | 0 | 0 | 0 | 187194 | 662 | 0 |
| INF03 | 196092 | | 0 | 0 | 0 | 0 | 196092 | 662 | 0 |
| INF04 | 196093 | | 0 | 0 | 0 | 0 | 196093 | 1134 | 0 |
| INF05 | 196093 | | 0 | 0 | 0 | 0 | 196093 | 1134 | 0 |
| INF06 | 172608 | | 22619 | 0 | 867 | 0 | 172608 | 360 | 0 |
| INF07 | 150568 | | 45525 | 0 | 0 | 0 | 0 | 350 | 85 |
| INF08 | 115802 | | 0 | 0 | 80291 | 0 | 0 | 290 | 50 |
| GAEF01 | 180192 | | 0 | 0 | 16038 | 0 | 0 | 620 | 0 |
| GAEF02 | 26960 | | 0 | 169272 | 0 | 0 | 0 | 529 | 81 |
| GAEF03 | 163797 | | 0 | 32434 | 0 | 0 | 0 | 280 | 0 |
| GAEF08 | 196230 | | 0 | 0 | 0 | 0 | 0 | 114 | 7 |
| GAEF09 | 190812 | | 0 | 5418 | 0 | 0 | 0 | 70 | 15 |
| GAEF10 | 178604 | | 0 | 17496 | 131 | 0 | 0 | 70 | 17 |
| GAEF11 | 153108 | | 0 | 32184 | 10939 | 0 | 0 | 100 | 20 |
| GAEF12 | 149217 | | 17579 | 14834 | 14600 | 0 | 0 | 129 | 49 |

**Table S2 continued**

**Table S3** Correlation matrices of variables. (A) Land use variables; (B) Native cover variables; (C) Habitat variables

1. Correlation matrix of land use variables. **AGR:** Agricultural area cover; **ANT:** Anthropic area cover; **REF:** area cover with exotic species reforestation.

|  | **AGR** | **ANT** | **REF** |
| --- | --- | --- | --- |
| **AGR** | 1.00 | -0.12 | 0.05 |
| **ANT** |  | 1.00 | -0.04 |
| **REF** |  |  | 1.00 |

1. Correlation matrix of native cover variables. **FOR**: Native forest cover; **GRA**: Native grassland cover; **AGU**: Water cover

|  | **FOR** | **GRA** | **WAT** |
| --- | --- | --- | --- |
| **FOR** | 1.00 | -0.73 | 0.03 |
| **GRA** |  | 1.00 | -0.05 |
| **WAT** |  |  | 1.00 |

**C**. Correlation matrix of habitat variables. **ARE**: Pond area; **DEP**: Pond depth; **HYD**: Hydroperiod; **VHI**: Emergent vegetation heterogeneity inside the pond; **VHM**: Vegetation heterogeneity at the margins of the pond; **CC**: Canopy cover.

|  | **ARE** | **DEP** | **HYD** | **VHM** | **VHI** | **CC** |
| --- | --- | --- | --- | --- | --- | --- |
| **ARE** | 1.00 | 0.14 | 0.12 | 0.15 | 0.27 | 0.00 |
| **DEP** |  | 1.00 | 0.46 | 0.33 | -0.10 | 0.08 |
| **HYD** |  |  | 1.00 | 0.03 | -0.07 | -0.05 |
| **VHM** |  |  |  | 1.00 | 0.39 | 0.40 |
| **VHI** |  |  |  |  | 1.00 | 0.07 |
| **CC** |  |  |  |  |  | 1.00 |

**Table S4:** Continuous morphological and ecomorphological traits. SVL: Snout–vent length, HW: Head width, HL: Head length, ED: Eye diameter, IOD: Interorbital distance, AL: Arm length, FAL: Forearm length, HAL: Hand length, THL: Thigh length, TL: Tibia length, TSL: Tarsus length, FL: Foot length; HS: Head shape, REP: Relative eye position, RLL: Relative limb length, RES: Relative eye size.

| **Species** | **SVL** | **HW** | **HL** | **IOD** | **ED** | **AL** | **FAL** | **HAL** | **THL** | **TL** | **TSL** | **FL** | **HS** | **REP** | **RLL** | **RES** |
| --- | --- | --- | --- | --- | --- | --- | --- | --- | --- | --- | --- | --- | --- | --- | --- | --- |
| *Aplastodiscus albosignatus* | 42.74 | 12.40 | 13.57 | 8.09 | 4.31 | 6.55 | 7.82 | 12.52 | 20.87 | 20.88 | 12.39 | 18.27 | 1.10 | 0.65 | 0.32 | 2.69 |
| *Aplastodiscus ehrhardti* | 38.50 | 11.95 | 13.25 | 5.95 | 3.35 | 9.40 | 7.70 | 4.05 | 20.00 | 19.80 | 12.05 | 6.95 | 1.19 | 0.50 | 0.25 | 0.36 |
| *Aplastodiscus perviridis* | 38.05 | 13.61 | 12.90 | 6.93 | 4.24 | 5.81 | 7.55 | 12.57 | 18.81 | 18.42 | 11.27 | 19.39 | 0.95 | 0.51 | 0.33 | 2.62 |
| *Boana albopunctata* | 56.13 | 16.45 | 19.74 | 10.72 | 5.93 | 8.66 | 8.92 | 16.52 | 31.46 | 32.33 | 18.20 | 26.83 | 1.20 | 0.65 | 0.30 | 3.19 |
| *Boana bischoffi* | 41.05 | 12.62 | 13.59 | 8.27 | 4.62 | 7.63 | 7.14 | 12.38 | 21.20 | 21.22 | 12.56 | 17.03 | 1.08 | 0.65 | 0.34 | 2.65 |
| *Boana faber* | 89.38 | 33.36 | 32.23 | 17.62 | 9.76 | 15.29 | 16.02 | 30.04 | 51.21 | 51.47 | 27.24 | 39.30 | 0.96 | 0.53 | 0.30 | 2.76 |
| *Boana leptolineata* | 26.13 | 6.93 | 7.36 | 5.05 | 2.70 | 4.88 | 4.59 | 7.05 | 12.17 | 12.17 | 8.08 | 9.77 | 1.06 | 0.73 | 0.37 | 2.55 |
| *Boana prasina* | 45.65 | 13.84 | 13.97 | 9.33 | 4.91 | 6.68 | 7.98 | 14.35 | 24.27 | 24.39 | 13.11 | 21.66 | 1.01 | 0.67 | 0.35 | 2.87 |
| *Boana pulchella* | 37.13 | 10.62 | 10.86 | 7.02 | 3.75 | 5.82 | 6.37 | 11.05 | 19.51 | 19.29 | 11.47 | 18.19 | 1.02 | 0.66 | 0.34 | 2.94 |
| *Bokermannohyla circumdata* | 58.26 | 19.77 | 20.12 | 11.22 | 7.01 | 8.46 | 10.43 | 19.00 | 29.98 | 30.48 | 16.62 | 25.45 | 1.02 | 0.57 | 0.35 | 2.70 |
| *Bokermannohyla hylax* | 62.00 | 20.70 | 21.30 | 9.60 | 5.60 | 16.1 | 13.00 | 7.20 | 32.00 | 31.00 | 17.00 | 11.00 | 1.03 | 0.46 | 0.26 | 0.40 |
| *Chiasmocleis leucosticta* | 18.68 | 5.70 | 5.08 | 2.90 | 1.30 | 3.78 | 3.72 | 4.96 | 7.42 | 7.60 | 4.94 | 8.28 | 0.89 | 0.51 | 0.26 | 2.27 |
| *Dendropsophus microps* | 22.09 | 7.05 | 6.32 | 4.72 | 2.75 | 3.87 | 4.16 | 6.57 | 10.74 | 10.80 | 5.91 | 9.75 | 0.90 | 0.67 | 0.43 | 2.55 |
| *Dendropsophus minutus* | 19.57 | 9.25 | 6.58 | 4.75 | 2.30 | 3.79 | 3.92 | 6.43 | 11.15 | 11.78 | 6.47 | 10.09 | 0.71 | 0.51 | 0.35 | 2.79 |
| *Dendropsophus nahdereri* | 44.65 | 14.45 | 12.95 | 7.45 | 4.05 | 12.30 | 8.80 | 5.00 | 21.85 | 21.65 | 12.00 | 8.50 | 0.90 | 0.51 | 0.31 | 0.41 |
| *Dendropsophus sanborni* | 16.46 | 4.65 | 4.73 | 2.99 | 1.97 | 2.47 | 2.73 | 4.83 | 7.34 | 8.23 | 4.66 | 6.97 | 1.01 | 0.64 | 0.48 | 2.71 |
| *Elachistocleis bicolor* | 24.24 | 6.53 | 6.58 | 3.45 | 1.58 | 2.70 | 3.20 | 5.43 | 8.22 | 8.58 | 5.28 | 10.58 | 1.01 | 0.53 | 0.24 | 2.88 |
| *Julianus uruguayus* | 23.70 | 7.29 | 6.71 | 4.45 | 2.30 | 4.26 | 4.86 | 7.36 | 10.90 | 11.10 | 6.50 | 11.94 | 0.92 | 0.61 | 0.34 | 2.45 |
| *Leptodactylus furnarius* | 33.38 | 10.68 | 13.98 | 4.82 | 3.30 | 4.53 | 5.87 | 7.42 | 17.21 | 20.75 | 11.34 | 21.62 | 1.31 | 0.45 | 0.23 | 3.98 |
| *Leptodactylus fuscus* | 47.20 | 15.50 | 17.68 | 7.07 | 4.67 | 5.76 | 7.50 | 10.45 | 22.42 | 25.44 | 13.51 | 24.63 | 1.14 | 0.46 | 0.26 | 3.62 |
| *Leptodactylus gracilis* | 46.14 | 15.35 | 17.03 | 6.63 | 4.17 | 6.17 | 8.30 | 10.33 | 23.95 | 29.08 | 13.91 | 28.59 | 1.11 | 0.43 | 0.25 | 3.85 |
| *Leptodactylus labyrinthicus* | 139.24 | 55.54 | 52.33 | 21.24 | 12.20 | 21.92 | 23.30 | 35.24 | 69.88 | 65.27 | 39.29 | 63.52 | 0.94 | 0.38 | 0.23 | 2.96 |
| *Leptodactylus luctator* | 90.03 | 31.82 | 32.97 | 11.77 | 6.95 | 15.10 | 16.18 | 21.28 | 43.70 | 45.34 | 24.64 | 46.35 | 1.04 | 0.37 | 0.21 | 3.04 |
| *Leptodactylus notoaktites* | 47.18 | 15.85 | 18.01 | 7.20 | 4.74 | 6.87 | 7.88 | 10.79 | 22.89 | 25.42 | 13.96 | 25.42 | 1.13 | 0.45 | 0.26 | 3.43 |
| *Leptodactylus plaumanni* | 36.34 | 11.53 | 13.90 | 5.48 | 3.41 | 5.77 | 6.37 | 8.66 | 17.59 | 20.13 | 10.77 | 22.61 | 1.20 | 0.47 | 0.24 | 3.42 |
| *Melanophryniscus vilavelhensis* | 13.51 | 4.57 | 4.66 | 2.47 | 1.62 | 2.61 | 3.07 | 3.62 | 4.88 | 4.79 | 3.50 | 4.44 | 0.99 | 0.54 | 0.35 | 1.89 |
| *Odontophrynus asper* | 44.64 | 19.86 | 16.32 | 8.00 | 5.08 | 6.46 | 9.84 | 14.80 | 17.60 | 15.80 | 9.52 | 23.14 | 0.82 | 0.40 | 0.31 | 2.12 |
| *Ololygon aromothyella* | 18.76 | 5.62 | 6.40 | 3.51 | 2.36 | 2.88 | 3.41 | 5.45 | 8.78 | 9.74 | 5.49 | 8.06 | 1.14 | 0.62 | 0.37 | 2.73 |
| *Ololygon catharinae* | 34.48 | 10.33 | 10.87 | 6.08 | 3.34 | 5.77 | 6.50 | 9.87 | 16.13 | 17.38 | 9.76 | 13.72 | 1.05 | 0.59 | 0.31 | 2.57 |
| *Ololygon rizibilis*  **Table S4 continued** | 25.06 | 7.48 | 8.98 | 5.44 | 3.06 | 5.40 | 4.92 | 8.10 | 12.90 | 13.96 | 7.68 | 11.78 | 1.20 | 0.72 | 0.34 | 2.51 |
| *Pithecopus rusticus* | 37.31 | 11.03 | 11.54 | 7.00 | 4.04 | 8.72 | 7.81 | 10.32 | 14.85 | 13.86 | 9.45 | 13.85 | 1.05 | 0.63 | 0.35 | 1.93 |
| *Phyllomedusa distincta* | 56.68 | 16.99 | 18.00 | 11.22 | 5.94 | 13.28 | 13.88 | 16.50 | 24.46 | 23.16 | 14.93 | 21.22 | 1.06 | 0.66 | 0.33 | 1.92 |
| *Phyllomedusa tetraploidea* | 62.21 | 19.08 | 20.42 | 12.50 | 6.13 | 14.95 | 15.28 | 19.62 | 27.27 | 26.11 | 16.09 | 24.47 | 1.07 | 0.65 | 0.30 | 1.88 |
| *Proceratophrys boiei* | 51.88 | 24.13 | 20.88 | 11.40 | 5.58 | 6.76 | 10.79 | 15.14 | 20.21 | 19.06 | 9.58 | 22.04 | 0.86 | 0.47 | 0.27 | 2.17 |
| *Proceratophrys brauni* | 27.76 | 12.74 | 11.04 | 5.28 | 2.72 | 3.97 | 5.88 | 7.66 | 9.83 | 9.02 | 4.82 | 11.32 | 0.87 | 0.41 | 0.25 | 1.99 |
| *Pseudis cardosoi* | 40.81 | 14.91 | 15.08 | 5.93 | 4.26 | 5.76 | 7.26 | 13.09 | 23.48 | 21.01 | 10.65 | 23.07 | 1.01 | 0.40 | 0.28 | 2.99 |
| *Physalaemus cuvieri* | 28.88 | 8.76 | 9.61 | 5.19 | 2.76 | 5.83 | 5.56 | 8.11 | 13.06 | 13.57 | 7.34 | 15.75 | 1.10 | 0.59 | 0.29 | 2.55 |
| *Physalaemus gracilis* | 26.99 | 7.21 | 8.98 | 4.89 | 2.43 | 5.17 | 4.84 | 7.27 | 12.07 | 12.77 | 6.89 | 13.03 | 1.24 | 0.70 | 0.27 | 2.59 |
| *Physalaemus lateristriga* | 31.44 | 9.08 | 10.36 | 5.99 | 3.52 | 5.62 | 6.11 | 9.36 | 13.74 | 15.25 | 7.36 | 16.91 | 1.14 | 0.66 | 0.40 | 2.52 |
| *Physalaemus nanus* | 12.40 | 4.44 | 4.65 | 2.68 | 1.97 | 2.65 | 2.72 | 3.98 | 5.26 | 5.17 | 3.09 | 5.34 | 1.05 | 0.60 | 0.42 | 2.02 |
| *Rhinella abei* | 58.44 | 20.84 | 20.06 | 10.12 | 6.30 | 12.28 | 12.84 | 14.84 | 26.38 | 27.10 | 15.44 | 26.56 | 0.96 | 0.48 | 0.31 | 2.39 |
| *Rhinella henseli* | 62.56 | 21.13 | 19.67 | 9.44 | 5.97 | 11.19 | 13.26 | 15.48 | 26.48 | 27.35 | 14.42 | 27.56 | 0.93 | 0.45 | 0.30 | 2.40 |
| *Rhinella_icterica* | 100.23 | 40.21 | 31.97 | 15.51 | 9.36 | 18.94 | 23.13 | 26.88 | 45.09 | 41.18 | 22.81 | 43.73 | 0.79 | 0.38 | 0.30 | 2.22 |
| *Scinax fuscovarius* | 42.17 | 13.57 | 13.39 | 8.20 | 4.57 | 6.92 | 7.05 | 11.90 | 21.03 | 22.77 | 11.95 | 19.71 | 0.99 | 0.60 | 0.34 | 2.92 |
| *Scinax granulatus* | 34.42 | 9.86 | 10.47 | 6.59 | 3.44 | 5.63 | 5.82 | 10.15 | 15.59 | 16.86 | 8.81 | 15.26 | 1.06 | 0.67 | 0.33 | 2.62 |
| *Scinax imbegue* | 30.35 | 9.40 | 10.85 | 4.95 | 2.95 | 7.15 | 5.60 | 3.70 | 13.90 | 14.75 | 8.45 | 5.70 | 1.15 | 0.52 | 0.27 | 0.38 |
| *Scinax perereca* | 38.42 | 11.65 | 12.48 | 7.07 | 3.84 | 6.06 | 6.46 | 11.21 | 17.71 | 19.75 | 10.35 | 17.32 | 1.07 | 0.61 | 0.31 | 2.74 |
| *Scinax rossaferesae* | 36.60 | 10.44 | 11.90 | 7.04 | 3.82 | 5.86 | 5.94 | 10.64 | 16.52 | 17.82 | 9.98 | 16.04 | 1.14 | 0.67 | 0.32 | 2.69 |
| *Scinax squalirostris* | 23.38 | 6.06 | 8.40 | 4.16 | 2.04 | 3.78 | 3.64 | 5.64 | 10.70 | 12.24 | 7.46 | 10.06 | 1.39 | 0.69 | 0.24 | 3.10 |
| *Scythrophrys sawayae* | 16.90 | 5.2 | 5.90 | 3.20 | 1.60 | 5.00 | 3.70 | 1.70 | 7.90 | 8.50 | 4.40 | 3.60 | 1.13 | 0.61 | 0.27 | 0.43 |
| *Sphaenorhynchus caramaschii* | 24.52 | 7.11 | 6.50 | 5.13 | 2.27 | 4.27 | 4.07 | 7.15 | 11.65 | 11.78 | 6.19 | 10.68 | 0.91 | 0.72 | 0.35 | 2.60 |
| *Sphaenorhynchus surdus* | 26.56 | 7.77 | 7.37 | 5.58 | 2.29 | 4.18 | 4.53 | 7.83 | 12.73 | 12.78 | 7.21 | 11.87 | 0.95 | 0.72 | 0.31 | 2.70 |
| *Trachycephalus dibernardoi* | 59.93 | 18.68 | 18.49 | 12.26 | 6.67 | 8.88 | 10.33 | 18.88 | 28.27 | 29.44 | 15.62 | 26.30 | 0.99 | 0.66 | 0.36 | 2.61 |

**Table S*5*:** Binary Morphological trait and binary and categorical ecological/reproductive traits. **PDA:** Presence of adhesive discs. **M01:** Eggs and exotrophic tadpoles in lentic water, **M02:** Eggs and exotrophic tadpoles in lotic water; **M03:** Eggs and early larval stages in constructed subaquatic chambers, exotrophic tadpoles in streams; **M04:** Eggs and early larval stages in natural or constructed basins; subsequent to flooding, exotrophic tadpoles in ponds or streams; **M05:** Eggs and early larval stages in subterranean constructed nests; subsequent to flooding, exotrophic tadpoles in ponds or streams; **M06:** Eggs and exotrophic tadpoles in water in tree holes or aerial plants; **M10:** Bubble nest floating on pond; exotrophic tadpoles in ponds; **M11:** Foam nest floating on pond; exotrophic tadpoles in ponds; **M13:** Foam nest floating on water accumulated in constructed basins; exotrophic tadpoles in ponds; **M24**: Eggs hatching into exotrophic tadpoles that drop in lentic water; **M28:** Foam nest on the humid forest floor; subsequent to flooding, exotrophic tadpoles in ponds; **M30:** Foam nest with eggs and early larval stages in subterranean constructed nests; subsequent to flooding, exotrophic tadpoles in ponds.**Vocalization site:** Perched (males vocalizing from elevated positions), water (males vocalizing while floating in the water column), ground (males vocalizing on the ground), burrow (males vocalizing in underground burrows they excavate), and/or phytotelmata (males vocalizing in water deposited in the leaf cavities of plants, such as bromeliads); **Macrohabitat:** Forest, open area, and edge (boundary between open area and forest) and **Reproductive pattern:** Prolonged breeding; explosive breeding and intermediate breeding.

|  |  | **Vocalization site** | | | | | | **Reproductive pattern** | | | **Macrohabitat** | | | **Reproductive modes** | | | | | | | | | | | | | | | |
| --- | --- | --- | --- | --- | --- | --- | --- | --- | --- | --- | --- | --- | --- | --- | --- | --- | --- | --- | --- | --- | --- | --- | --- | --- | --- | --- | --- | --- | --- |
| **Species** | **PAD** | **Perched** | **Phytotelmata** | **Ground** | **Water** | **Burrow** | **Prolonged** | | **Explosive** | **Intermediate** | **Forest** | **Edge** | **Open area** | **M01** | **M02** | | **M03** | | **M04** | | **M05** | | **M06** | **M10** | **M11** | **M13** | **M24** | **M28** | **M30** |
| *Aplastodiscus albosignatus* | 1 | 1 | 0 | 0 | 0 | 0 | 0 | | 0 | 1 | 1 | 1 | 0 | 0 | 0 | | 0 | | 0 | | 1 | | 0 | 0 | 0 | 0 | 0 | 0 | 0 |
| *Aplastodiscus ehrhardti* | 1 | 1 | 0 | 0 | 0 | 0 | 0 | | 0 | 1 | 1 | 1 | 0 | 0 | 0 | | 0 | | 0 | | 1 | | 0 | 0 | 0 | 0 | 0 | 0 | 0 |
| *Aplastodiscus perviridis* | 1 | 1 | 0 | 0 | 0 | 0 | 0 | | 0 | 1 | 1 | 1 | 0 | 0 | 0 | | 0 | | 0 | | 1 | | 0 | 0 | 0 | 0 | 0 | 0 | 0 |
| *Boana albopunctata* | 1 | 1 | 0 | 0 | 0 | 0 | 0 | | 0 | 1 | 0 | 1 | 1 | 1 | 0 | | 0 | | 0 | | 0 | | 0 | 0 | 0 | 0 | 0 | 0 | 0 |
| *Boana bischoffi* | 1 | 1 | 0 | 1 | 1 | 0 | 0 | | 0 | 1 | 1 | 1 | 1 | 1 | 0 | | 0 | | 0 | | 0 | | 0 | 0 | 0 | 0 | 0 | 0 | 0 |
| *Boana faber* | 1 | 1 | 0 | 1 | 1 | 0 | 1 | | 0 | 0 | 1 | 1 | 1 | 1 | 0 | | 0 | | 1 | | 0 | | 0 | 0 | 0 | 0 | 0 | 0 | 0 |
| *Boana leptolineata* | 1 | 1 | 0 | 1 | 0 | 0 | 1 | | 0 | 0 | 0 | 1 | 1 | 1 | 1 | | 0 | | 0 | | 0 | | 0 | 0 | 0 | 0 | 0 | 0 | 0 |
| *Boana prasina* | 1 | 1 | 0 | 1 | 1 | 0 | 1 | | 0 | 0 | 1 | 1 | 1 | 1 | 1 | | 0 | | 0 | | 0 | | 0 | 0 | 0 | 0 | 0 | 0 | 0 |
| *Boana pulchella* | 1 | 1 | 0 | 1 | 1 | 0 | 1 | | 0 | 0 | 0 | 1 | 1 | 1 | 0 | | 0 | | 0 | | 0 | | 0 | 0 | 0 | 0 | 0 | 0 | 0 |
| *Bokermannohyla circumdata* | 1 | 1 | 0 | 0 | 0 | 0 | 0 | | 0 | 1 | 1 | 0 | 0 | 0 | 1 | | 0 | | 1 | | 0 | | 0 | 0 | 0 | 0 | 0 | 0 | 0 |
| *Bokermannohyla hylax* | 1 | 1 | 0 | 0 | 0 | 0 | 0 | | 0 | 1 | 1 | 0 | 0 | 0 | 0 | | 0 | | 1 | | 0 | | 0 | 0 | 0 | 0 | 0 | 0 | 0 |
| *Chiasmocleis leucosticta* | 0 | 0 | 0 | 0 | 1 | 0 | 0 | | 1 | 0 | 1 | 1 | 0 | 0 | 0 | | 0 | | 0 | | 0 | | 0 | 1 | 0 | 0 | 0 | 0 | 0 |
| *Dendropsophus microps* | 1 | 1 | 0 | 0 | 0 | 0 | 0 | | 0 | 1 | 1 | 1 | 0 | 1 | 0 | | 0 | | 0 | | 0 | | 0 | 0 | 0 | 0 | 0 | 0 | 0 |
| *Dendropsophus minutus* | 1 | 1 | 0 | 1 | 1 | 0 | 1 | | 0 | 0 | 0 | 1 | 1 | 1 | 0 | | 0 | | 0 | | 0 | | 0 | 0 | 0 | 0 | 0 | 0 | 0 |
| *Dendropsophus nahdereri* | 1 | 1 | 0 | 1 | 0 | 0 | 0 | | 0 | 1 | 1 | 1 | 1 | 1 | 0 | | 0 | | 0 | | 0 | | 0 | 0 | 0 | 0 | 0 | 0 | 0 |
| *Dendropsophus sanborni* | 1 | 1 | 0 | 0 | 0 | 0 | 1 | | 0 | 0 | 1 | 1 | 1 | 1 | 0 | | 0 | | 0 | | 0 | | 0 | 0 | 0 | 0 | 0 | 0 | 0 |
| *Elachistocleis bicolor* | 0 | 0 | 0 | 0 | 1 | 0 | 0 | | 1 | 0 | 0 | 1 | 1 | 1 | 0 | | 0 | | 0 | | 0 | | 0 | 0 | 0 | 0 | 0 | 0 | 0 |
| *Julianus uruguayus* | 1 | 1 | 0 | 1 | 0 | 0 | 0 | | 1 | 0 | 0 | 0 | 1 | 1 | 0 | | 0 | | 0 | | 0 | | 0 | 0 | 0 | 0 | 0 | 0 | 0 |
| *Leptodactylus furnarius* | 0 | 0 | 0 | 1 | 0 | 1 | 1 | | 0 | 0 | 0 | 0 | 1 | 0 | 0 | | 0 | | 0 | | 0 | | 0 | 0 | 0 | 0 | 0 | 0 | 1 |
| *Leptodactylus fuscus* | 0 | 0 | 0 | 1 | 0 | 1 | 1 | | 0 | 0 | 0 | 1 | 1 | 0 | 0 | | 0 | | 0 | | 0 | | 0 | 0 | 0 | 0 | 0 | 0 | 1 |
| *Leptodactylus gracilis* | 0 | 0 | 0 | 0 | 0 | 1 | 1 | | 0 | 0 | 0 | 1 | 1 | 0 | 0 | | 0 | | 0 | | 0 | | 0 | 0 | 0 | 0 | 0 | 0 | 1 |
| *Leptodactylus labyrinthicus* | 0 | 0 | 0 | 1 | 1 | 0 | 0 | | 0 | 1 | 0 | 0 | 1 | 0 | 0 | | 0 | | 0 | | 0 | | 0 | 0 | 0 | 1 | 0 | 0 | 0 |
| *Leptodactylus luctator* | 0 | 0 | 0 | 1 | 1 | 0 | 1 | | 0 | 0 | 1 | 1 | 1 | 0 | 0 | | 0 | | 0 | | 0 | | 0 | 0 | 1 | 0 | 0 | 0 | 0 |
| *Leptodactylus notoaktites* | 0 | 0 | 0 | 0 | 0 | 1 | 0 | | 0 | 1 | 1 | 1 | 1 | 0 | 0 | | 0 | | 0 | | 0 | | 0 | 0 | 0 | 0 | 0 | 0 | 1 |
| *Leptodactylus plaumanni* | 0 | 0 | 0 | 1 | 0 | 1 | 0 | | 0 | 1 | 0 | 1 | 1 | 0 | 0 | | 0 | | 0 | | 0 | | 0 | 0 | 0 | 0 | 0 | 0 | 1 |
| *Melanophryniscus vilavelhensis* | 0 | 0 | 1 | 0 | 0 | 0 | 0 | | 1 | 0 | 0 | 0 | 1 | 0 | 0 | | 0 | | 0 | | 0 | | 1 | 0 | 0 | 0 | 0 | 0 | 0 |
| *Odontophrynus asper* | 0 | 0 | 0 | 1 | 1 | 0 | 0 | | 1 | 0 | 0 | 1 | 1 | 1 | | 0 | | 0 | | 0 | | 0 | 0 | 0 | 0 | 0 | 0 | 0 | 0 |
| *Ololygon aromothyella* | 1 | 1 | 0 | 0 | 0 | 0 | 1 | | 0 | 0 | 1 | 1 | 1 | 1 | | 0 | | 0 | | 0 | | 0 | 0 | 0 | 0 | 0 | 0 | 0 | 0 |
| *Ololygon catharinae* | 1 | 1 | 0 | 0 | 0 | 0 | 0 | | 0 | 1 | 1 | 1 | 0 | 1 | | 0 | | 0 | | 0 | | 0 | 0 | 0 | 0 | 0 | 0 | 0 | 0 |
| *Ololygon rizibilis* | 1 | 1 | 0 | 0 | 0 | 0 | 0 | | 0 | 1 | 1 | 1 | 1 | 0 | | 0 | | 0 | | 0 | | 0 | 0 | 0 | 1 | 0 | 0 | 0 | 0 |
| *Phyllomedusa distincta* | 1 | 1 | 0 | 0 | 0 | 0 | 0 | | 0 | 1 | 1 | 1 | 1 | 0 | | 0 | | 0 | | 0 | | 0 | 0 | 0 | 0 | 0 | 1 | 0 | 0 |
| *Phyllomedusa tetraploidea* | 1 | 1 | 0 | 0 | 0 | 0 | 0 | | 0 | 1 | 1 | 1 | 1 | 0 | | 0 | | 0 | | 0 | | 0 | 0 | 0 | 0 | 0 | 1 | 0 | 0 |
| *Physalaemus cuvieri* | 0 | 0 | 0 | 1 | 0 | 0 | 1 | | 0 | 0 | 1 | 1 | 0 | 0 | | 0 | | 0 | | 0 | | 0 | 0 | 0 | 1 | 0 | 0 | 1 | 0 |
| *Physalaemus gracilis* | 0 | 0 | 0 | 1 | 1 | 0 | 0 | | 0 | 1 | 1 | 1 | 0 | 1 | | 1 | | 0 | | 0 | | 0 | 0 | 0 | 0 | 0 | 0 | 0 | 0 |
| *Physalaemus lateristriga* | 0 | 0 | 0 | 1 | 1 | 0 | 0 | | 1 | 0 | 1 | 1 | 0 | 0 | | 1 | | 0 | | 0 | | 0 | 0 | 0 | 0 | 0 | 0 | 0 | 0 |
| *Physalaemus nanus* | 0 | 0 | 0 | 0 | 1 | 0 | 0 | | 0 | 1 | 1 | 1 | 1 | 1 | | 0 | | 0 | | 0 | | 0 | 0 | 0 | 0 | 0 | 0 | 0 | 0 |
| *Pithecopus rusticus* | 1 | 1 | 0 | 0 | 0 | 0 | 0 | | 0 | 1 | 0 | 0 | 1 | 0 | | 0 | | 0 | | 0 | | 0 | 0 | 0 | 0 | 0 | 1 | 0 | 0 |
| *Proceratophrys boiei* | 0 | 0 | 0 | 1 | 1 | 0 | 0 | | 0 | 1 | 1 | 1 | 1 | 0 | | 0 | | 0 | | 0 | | 0 | 0 | 0 | 1 | 0 | 0 | 0 | 0 |
| *Proceratophrys brauni* | 0 | 0 | 0 | 0 | 1 | 0 | 1 | | 0 | 0 | 1 | 1 | 1 | 0 | | 0 | | 0 | | 0 | | 0 | 0 | 0 | 1 | 0 | 0 | 0 | 0 |
| *Pseudis cardosoi* | 0 | 0 | 0 | 1 | 0 | 0 | 0 | | 0 | 1 | 1 | 1 | 0 | 0 | | 0 | | 0 | | 0 | | 0 | 0 | 0 | 1 | 0 | 0 | 0 | 0 |
| *Rhinella abei* | 0 | 0 | 0 | 1 | 1 | 0 | 1 | | 0 | 0 | 1 | 1 | 1 | 1 | | 1 | | 0 | | 0 | | 0 | 0 | 0 | 0 | 0 | 0 | 0 | 0 |
| *Rhinella henseli* | 0 | 0 | 0 | 1 | 1 | 0 | 1 | | 0 | 0 | 1 | 1 | 1 | 1 | | 1 | | 0 | | 0 | | 0 | 0 | 0 | 0 | 0 | 0 | 0 | 0 |
| *Rhinella icterica* | 0 | 0 | 0 | 1 | 1 | 0 | 1 | | 0 | 0 | 1 | 1 | 1 | 1 | | 1 | | 0 | | 0 | | 0 | 0 | 0 | 0 | 0 | 0 | 0 | 0 |
| *Scinax fuscovarius* | 1 | 1 | 0 | 1 | 1 | 0 | 0 | | 0 | 1 | 1 | 1 | 1 | 1 | | 0 | | 0 | | 0 | | 0 | 0 | 0 | 0 | 0 | 0 | 0 | 0 |
| *Scinax granulatus* | 1 | 1 | 0 | 1 | 1 | 0 | 0 | | 0 | 1 | 1 | 1 | 1 | 1 | | 0 | | 0 | | 0 | | 0 | 0 | 0 | 0 | 0 | 0 | 0 | 0 |
| *Scinax imbegue* | 1 | 1 | 0 | 0 | 0 | 0 | 0 | | 0 | 1 | 0 | 1 | 1 | 1 | | 0 | | 0 | | 0 | | 0 | 0 | 0 | 0 | 0 | 0 | 0 | 0 |
| *Scinax perereca* | 1 | 1 | 0 | 0 | 0 | 0 | 0 | | 0 | 1 | 1 | 1 | 1 | 1 | | 0 | | 0 | | 0 | | 0 | 0 | 0 | 0 | 0 | 0 | 0 | 0 |
| *Scinax rossaferesae* | 1 | 1 | 0 | 1 | 0 | 0 | 0 | | 1 | 0 | 0 | 0 | 1 | 1 | | 0 | | 0 | | 0 | | 0 | 0 | 0 | 0 | 0 | 0 | 0 | 0 |
| *Scinax squalirostris* | 1 | 1 | 0 | 0 | 0 | 0 | 1 | | 0 | 0 | 0 | 0 | 1 | 1 | | 0 | | 0 | | 0 | | 0 | 0 | 0 | 0 | 0 | 0 | 0 | 0 |
| *Scythrophrys sawayae* | 0 | 0 | 0 | 1 | 0 | 0 | 0 | | 0 | 1 | 1 | 0 | 0 | 1 | | 0 | | 0 | | 0 | | 0 | 0 | 0 | 0 | 0 | 0 | 0 | 0 |
| *Sphaenorhynchus caramaschii* | 1 | 1 | 0 | 0 | 1 | 0 | 0 | | 0 | 1 | 1 | 1 | 1 | 1 | | 0 | | 0 | | 0 | | 0 | 0 | 0 | 0 | 0 | 0 | 0 | 0 |
| *Sphaenorhynchus surdus* | 1 | 1 | 0 | 0 | 1 | 0 | 0 | | 0 | 1 | 1 | 1 | 1 | 1 | | 0 | | 0 | | 0 | | 0 | 0 | 0 | 0 | 0 | 0 | 0 | 0 |
| *Trachycephalus dibernardoi* | 1 | 1 | 0 | 0 | 0 | 0 | 0 | | 1 | 0 | 1 | 1 | 0 | 1 | | 0 | | 0 | | 0 | | 0 | 0 | 0 | 0 | 0 | 0 | 0 | 0 |

**Table S5 continued**

**Table S6:** Correlation matrix of categorical traits. Morphological trait Presence of adhesive discs (PAD); Vocalization site: Perched (males vocalizing from elevated positions), water (males vocalizing while floating in the water column), ground (males vocalizing on the ground), burrow (males vocalizing in underground burrows they excavate), and/or phytotelmata (males vocalizing in water deposited in the leaf cavities of plants, such as bromeliads); Macrohabitat: Forest, open area, and edge (boundary between open area and forest); M: Reproductive modes according to Haddad and Prado 2005; Reproductive pattern: Prolonged breeding; explosive breeding and intermediate breeding.

|  |  | **Vocalization site** | | | | | **Macrohabitat** | | | **Reproductive modes** | | | | | | | | | | | **Reproductive pattern** | | | |
| --- | --- | --- | --- | --- | --- | --- | --- | --- | --- | --- | --- | --- | --- | --- | --- | --- | --- | --- | --- | --- | --- | --- | --- | --- |
|  | **PAD** | **Perching** | **Phytotelmata** | **Ground** | **Water** | **Burrow** | **Forest** | **Edge** | **Open area** | **M01** | **M02** | **M04** | **M05** | **M06** | **M10** | **M11** | **M13** | **M24** | **M28** | **M30** | **Prolonged** | **Explosive** | **Intermediate** | |
| **PAD** | 1 |  |  |  |  |  |  |  |  |  |  |  |  |  |  |  |  |  |  |  |  |  |  |
| **Perching** | 1 | 1 |  |  |  |  |  |  |  |  |  |  |  |  |  |  |  |  |  |  |  |  |  |
| **Phytotelmata** | -0.1646 | -0.1646 | 1 |  |  |  |  |  |  |  |  |  |  |  |  |  |  |  |  |  |  |  |  |
| **Ground** | -0.3223 | -0.3223 | -0.1361 | 1 |  |  |  |  |  |  |  |  |  |  |  |  |  |  |  |  |  |  |  |
| **Water** | -0.3006 | -0.3006 | -0.1168 | 0.3989 | 1 |  |  |  |  |  |  |  |  |  |  |  |  |  |  |  |  |  |  |
| **Burrow** | -0.3831 | -0.3831 | -0.0448 | 0.0706 | -0.2719 | 1 |  |  |  |  |  |  |  |  |  |  |  |  |  |  |  |  |  |
| **Forest** | 0.0774 | 0.0774 | -0.2018 | -0.1343 | 0.1687 | -0.3314 | 1 |  |  |  |  |  |  |  |  |  |  |  |  |  |  |  |  |
| **Edge** | -0.0148 | -0.0148 | -0.2876 | -0.0091 | 0.3084 | -0.0093 | 0.3918 | 1 |  |  |  |  |  |  |  |  |  |  |  |  |  |  |  |
| **Open area** | 0.0164 | 0.0164 | 0.0831 | 0.1599 | 0.2442 | 0.1934 | -0.4117 | 0.0392 | 1 |  |  |  |  |  |  |  |  |  |  |  |  |  |  |
| **M01** | 0.3440 | 0.3440 | -0.1584 | 0.1739 | 0.2741 | -0.3686 | -0.0308 | 0.1616 | 0.2525 | 1 |  |  |  |  |  |  |  |  |  |  |  |  |  |
| **M02** | -0.1796 | -0.1796 | -0.0585 | 0.3242 | 0.2866 | -0.1361 | 0.1768 | 0.0686 | -0.1060 | 0.1565 | 1 |  |  |  |  |  |  |  |  |  |  |  |  |
| **M04** | 0.2063 | 0.2063 | -0.0340 | -0.0770 | -0.0406 | -0.0791 | 0.1683 | -0.2992 | -0.2236 | -0.1150 | 0.1248 | 1 |  |  |  |  |  |  |  |  |  |  |  |
| **M05** | 0.2063 | 0.2063 | -0.0340 | -0.2404 | -0.2063 | -0.0791 | 0.1683 | 0.1181 | -0.4088 | -0.2797 | -0.1033 | -0.0600 | 1 |  |  |  |  |  |  |  |  |  |  |
| **M06** | -0.1646 | -0.1646 | 1 | -0.1361 | -0.1168 | -0.0448 | -0.2018 | -0.2876 | 0.0831 | -0.1584 | -0.0585 | -0.0340 | -0.03340 | 1 |  |  |  |  |  |  |  |  |  |
| **M10** | -0.1646 | -0.1646 | -0.0192 | -0.1361 | 0.1646 | -0.0448 | 0.0953 | 0.0669 | -0.2314 | -0.1584 | -0.0585 | -0.0340 | -0.03340 | -0.0192 | 1 |  |  |  |  |  |  |  |  |
| **M11** | -0.3033 | -0.3033 | -0.0495 | 0.1259 | 0.0616 | -0.1153 | 0.2455 | 0.1723 | -0.0561 | -0.4081 | -0.1506 | -0.0875 | -0.0875 | -0.0495 | -0.0495 | 1 |  |  |  |  |  |  |  |
| **M13** | -0.1646 | -0.1646 | -0.0192 | 0.1413 | 0.1646 | -0.0448 | -0.2018 | -0.2876 | 0.0831 | -0.1584 | -0.0585 | -0.0340 | -0.0340 | -0.0192 | -0.0192 | -0.0495 | 1 |  |  |  |  |  |  |
| **M24** | 0.2063 | 0.2063 | -0.0340 | -0.2404 | -0.2063 | -0.0791 | -0.0066 | -0.0906 | 0.1468 | -0.2797 | -0.1033 | -0.0600 | -0.0600 | -0.0340 | -0.0340 | -0.0875 | -0.0340 | 1 |  |  |  |  |  |
| **M28** | -0.1646 | -0.1646 | -0.0192 | 0.1413 | -0.1168 | -0.0448 | 0.0953 | 0.0669 | -0.2314 | -0.1584 | -0.0585 | -0.0340 | -0.0340 | -0.0192 | -0.0192 | 0.3881 | -0.0192 | -0.0340 | 1 |  |  |  |  |
| **M30** | -0.3831 | -0.3831 | -0.0448 | 0.0706 | -0.2719 | 1 | -0.3314 | -0.0093 | 0.1934 | -0.3686 | -0.1361 | -0.0791 | -0.0791 | -0.0448 | -0.0448 | -0.1153 | -0.0448 | -0.0791 | -0.0448 | 1 |  |  |  |
| **Prolonged** | -0.1594 | -0.1594 | -0.0953 | 0.2960 | 0.1594 | 0.1931 | -0.1340 | 0.1248 | 0.3200 | 0.1123 | 0.2748 | 0.0066 | -0.1683 | -0.0953 | -0.0953 | 0.1372 | -0.0953 | -0.1683 | 0.2018 | 0.1931 | 1 |  |  |
| **Explosive** | -0.1796 | -0.1796 | 0.3289 | 0.0080 | 0.0726 | -0.1361 | -0.2748 | -0.2008 | -0.1060 | 0.0502 | -0.0306 | -0.1033 | -0.1033 | 0.3289 | 0.3289 | -0.1506 | -0.0585 | -0.1033 | -0.0585 | -0.1360 | -0.2897 | 1 |  |
| **Intermediate** | 0.2779 | 0.2779 | -0.1468 | -0.2824 | -0.2012 | -0.0829 | 0.3224 | 0.0273 | -0.2232 | -0.1410 | -0.2351 | 0.0679 | 0.2314 | -0.1468 | -0.1468 | -0.0203 | 0.1310 | 0.2314 | -0.1468 | -0.0829 | -0.7272 | -0.4462 | 1 |

**Table S7** List of species recorded in the areas sampled.

| **Family/***Species* |
| --- |
| **Bufonidae** |
| *Melanophryniscus vilavelhensis* Steinbach-Padilha, 2008 |
| *Rhinella ornata* (Spix, 1824) |
| *Rhinella henseli* (Lutz, 1934) |
| *Rhinella icterica* (Spix, 1824) |
| **Hylidae** |
| *Aplastodiscus albosignatus* (Lutz & Lutz, 1938) |
| *Aplastodiscus ehrhardti* (Müller, 1924) |
| *Aplastodiscus perviridis* Lutz, 1950 |
| *Boana albopunctata* (Spix, 1824) |
| *Boana bischoffi* (Boulenger, 1887) |
| *Boana faber* (Wied-Neuwied, 1821) |
| *Boana leptolineata* (Braun & Braun, 1977) |
| *Boana prasina* (Burmeister, 1856) |
| *Boana pulchella* (Duméril & Bibron, 1841) |
| *Bokermannohyla circumdata* (Cope, 1871) |
| *Bokermannohyla hylax* (Heyer, 1985) |
| *Dendropsophus microps* (Peters, 1872) |
| *Dendropsophus minutus* (Peters, 1872) |
| *Dendropsophus nahdereri* (Lutz & Bokermann, 1963) |
| *Dendropsophus sanborni* (Schmidt, 1944) |
| *Julianus uruguayus (Schmidt, 1944)* |
| *Ololygon aromothyella Faivovich, 2005*  *Ololygon catharinae (Boulenger, 1888)* |
| *Ololygon rizibilis Bokermann, 1964* |
| *Pithecopus rusticus* (Bruschi, Lucas, Garcia & Recco-Pimentel, 2014) |
| *Phyllomedusa distincta* Lutz, 1950 |
| *Phyllomedusa tetraploidea* Pombal & Haddad, 1992 |
| *Pseudis cardosoi* Kwet, 2000 |
| *Scinax fuscovarius* (Lutz, 1925) |
| *Scinax granulatus* (Peters, 1871) |
| *Scinax imbegue* Nunes, Kwet, & Pombal, 2012 |
| *Scinax perereca* Pombal, Haddad & Kasahara, 1995 |
| *Scinax rossaferesae* Conte, Araujo-Vieira, Crivellari, & Berneck, 2016 |
| *Scinax squalirostris* (Lutz, 1925) |
| *Sphaenorhynchus caramaschii* Toledo, Garcia, Lingnau & Haddad, 2007 |
| *Sphaenorhynchus surdus* (Cochran, 1953) |
| *Trachycephalus dibernardoi* Kwet and Solé, 2008 |
|  |
|  |
|  |
| **Family/***Species*  **Leptodactylidae** |
| *Leptodactylus furnarius* Sazima& Bokermann, 1978 |
| *Leptodactylus fuscus* (Schneider, 1799) |
| *Leptodactylus gracilis* (Duméril & Bibron, 1840) |
| *Leptodactylus labyrinthicus* (Spix, 1824) |
| *Leptodactylus luctator* (Steffen, 1815*)* |
| *Leptodactylus notoaktites* Heyer, 1978 |
| *Leptodactylus plaumanni* Ahl, 1936 |
| *Physalaemus cuvieri* Fitzinger, 1826 |
| *Physalaemus gracilis* (Boulenger, 1883) |
| *Physalaemus lateristriga* (Steindachner, 1864) |
| *Physalaemus nanus* (Boulenger, 1888) |
| *Scythrophrys sawayae* (Cochran, 1953) |
| **Microhylidae** |
| *Chiasmocleis leucosticta* (Boulenger, 1888) |
| *Elachistocleis bicolor* (Guérin-Méneville, 1838) |
| **Odontophrynidae** |
| *Odontophrynus asper (Philippi, 1902)* |
| *Proceratophrys boiei* (Wied-Neuwied, 1824) |
| *Proceratophrys brauni* Kwet and Faivovich, 2001 |

**Table S7: continued**

**Table S8:** Species richness, individual abundance, and standardized effect size of functional diversity (**SES.FD**) values for each pond. **DFPA** = Serra Dona Francisca Environmental Protection Area; **PNF** = Piraí do Sul National Forest; **GSP** = Guartelá State Park; **VVSP** = Vila Velha State Park; **CGNP** = Campos Gerais National Park; **CWR** = Campos de Palmas Wildlife Refuge; **INF** = Irati National Forest, **GAEF** = Gralha Azul Experimental Farm (PUC – Paraná).

| **Pond** | **Richness** | **Abundance** | **SES.FD** |
| --- | --- | --- | --- |
| DFPA01 | 14 | 244 | 0.465332 |
| DFPA02 | 9 | 128 | 0.732726 |
| DFPA03 | 7 | 40 | 0.315883 |
| DFPA04 | 17 | 610 | 0.801659 |
| DFPA05 | 12 | 127 | 0.696476 |
| DFPA06 | 9 | 107 | 0.903127 |
| DFPA07 | 9 | 81 | 0.334640 |
| DFPA08 | 8 | 58 | 0.278423 |
| DFPA09 | 12 | 231 | 0.204197 |
| DFPA10 | 14 | 143 | 1.308454 |
| DFPA11 | 9 | 53 | 0.126749 |
| DFPA12 | 13 | 179 | 0.641117 |
| DFPA13 | 13 | 133 | 0.748714 |
| PNF01 | 9 | 509 | 0.908067 |
| PNF02 | 14 | 251 | 0.096153 |
| PNF03 | 8 | 49 | 0.243808 |
| PNF04 | 8 | 73 | 1.207160 |
| PNF05 | 12 | 348 | 0.444748 |
| PNF06 | 10 | 284 | 0.674707 |
| PNF07 | 8 | 213 | 0.415716 |
| PNF08 | 6 | 161 | 0.840269 |
| GSP01 | 12 | 97 | -0.368167 |
| GSP02 | 9 | 51 | 0.270435 |
| GSP03 | 7 | 95 | 0.796967 |
| GSP04 | 8 | 64 | 0.150451 |
| GSP05 | 12 | 177 | -0.512129 |
| GSP06 | 9 | 74 | -0.605379 |
| GSP07 | 8 | 530 | -0.514950 |
| GSP08 | 13 | 378 | 0.056101 |
| GSP09 | 6 | 67 | 0.178804 |
| GSP10 | 9 | 58 | -0.864428 |
| VVSP01 | 7 | 61 | -0.364631 |
| VVSP02 | 9 | 71 | 0.438064 |
| VVSP03 | 6 | 12 | 0.132452 |
| VVSP04 | 15 | 542 | -0.203724 |
| VVSP05 | 6 | 32 | 0.724621 |
| VVSP06 | 11 | 221 | 0.573606 |
| VVSP07 | 15 | 281 | 0.424529 |
| VVSP08 | 18 | 3332 | 0.363800 |

| **Pond** | **Richeness** | **Abundance** | **SES.FD** |
| --- | --- | --- | --- |
| CGNP01 | 14 | 305 | 0.094907 |
| CGNP02 | 12 | 500 | -0.029821 |
| CGNP03 | 10 | 237 | -0.241090 |
| CGNP04 | 7 | 147 | -1.540787 |
| CGNP05 | 10 | 157 | -0.121947 |
| CGNP06 | 9 | 110 | 0.291585 |
| CGNP07 | 10 | 1413 | -1.0853685 |
| CGNP08 | 13 | 247 | -0.400463 |
| CGNP09 | 10 | 119 | -0.239651 |
| CGNP10 | 9 | 174 | -0.317151 |
| CGNP11 | 12 | 214 | 0.770746 |
| CGNP12 | 13 | 327 | 0.035632 |
| CGNP13 | 5 | 94 | 0.282225 |
| CGNP14 | 15 | 1682 | -0.038747 |
| CWR01 | 9 | 143 | -0.482337 |
| CWR02 | 10 | 179 | -0.935944 |
| CWR03 | 4 | 56 | 0.068484 |
| CWR04 | 13 | 957 | -1.485270 |
| CWR05 | 8 | 49 | -0.906592 |
| CWR06 | 9 | 309 | -0.113209 |
| CWR07 | 11 | 493 | 0.562366 |
| CWR08 | 12 | 1019 | -0.839060 |
| CWR09 | 8 | 363 | -0.777974 |
| CWR10 | 8 | 299 | -0.507405 |
| CWR11 | 10 | 335 | -0.844858 |
| CWR12 | 5 | 31 | -1.800717 |
| INF01 | 4 | 20 | 0.016319 |
| INF02 | 8 | 179 | 0.844832 |
| INF03 | 5 | 99 | 0.316187 |
| INF04 | 2 | 7 | 0.364172 |
| INF05 | 7 | 72 | 0.328423 |
| INF06 | 12 | 159 | 0.653203 |
| INF07 | 7 | 119 | 0.215727 |
| INF08 | 7 | 78 | 0.795654 |
| GAEF01 | 15 | 1181 | 0.593759 |
| GAEF02 | 18 | 1030 | 0.333576 |
| GAEF03 | 12 | 375 | 0.546533 |
| GAEF08 | 12 | 185 | 0.255111 |
| GAEF09 | 10 | 115 | 0.311413 |
| GAEF10 | 5 | 43 | 0.042500 |
| GAEF11 | 8 | 137 | 0.537782 |
| GAEF12 | 11 | 297 | 0.762531 |

**Table S8 continued**
